# Supplementary material
Source: PubMed Central journal article supplement (PMC2891453)
Supplement: supp_51_6_2852__1.pdf [file supp_51_6_2852__1.pdf]

**Supplementary Table S1: *Rdy* Candidate Genes/Genomic Regions**

| <b>Candidate Gene</b> | <b>Former Name*</b> | <b>Disease Category*</b>       | <b>Candidate region Human<br/>(Chr:position, Mb)<sup>†</sup></b> | <b>Candidate region Cat<br/>(Chr:position, Mb)<sup>‡</sup></b> | <b>Function</b>                                                       | <b>Exons</b> |
|-----------------------|---------------------|--------------------------------|------------------------------------------------------------------|----------------------------------------------------------------|-----------------------------------------------------------------------|--------------|
| <i>CA4</i>            | RP17                | adRP                           | Chr17:55.58                                                      | ChrE1:51.62                                                    | carbonic anhydrase IV                                                 | 8            |
| <i>CRX</i>            | CORD2, LCA7         | adLCA, arLCA,<br>adRP, adCoRD  | Chr19:53.02                                                      | ChrE2:9.88                                                     | transcription factor for rod/cone<br>photoreceptor development        | 4            |
| <i>FSCN2</i>          | RP30                | adRP, adMD                     | Chr17:77.11                                                      | ChrE1:132.82                                                   | photoreceptor-specific paralog of the<br>actin-binding protein fascin | 5            |
| <i>GUCA1B</i>         |                     | adRP, adMD                     | Chr6:42.26                                                       | ChrB2:43.33                                                    | guanylate cyclase activating protein 1B                               | 4            |
| <i>IMPDH1</i>         | LCA11, RP10         | adLCA, arLCA,                  | Chr7:12.78                                                       | ChrA2:211.18                                                   | inosine monophosphate dehydrogenase<br>1                              | 16           |
| <i>NRL</i>            | RP27                | adRP, arRP                     | Chr14:23.62                                                      | ChrB3:81.25                                                    | retinal transcription factor                                          | 3            |
| <i>PRPF3</i>          | RP18                | adRP                           | Chr1:14.86                                                       | ChrC1:110.54                                                   | homolog of yeast pre-mRNA splicing<br>factor 3                        | 16           |
| <i>PRPF31</i>         | RP11                | adRP                           | Chr19:59.31                                                      | ChrE2:3.84                                                     | homolog of yeast pre-mRNA splicing<br>factor 31                       | 14           |
| <i>PRPF8</i>          |                     | adRP                           | Chr17:15.01                                                      | ChrE1:40.46                                                    | homolog of yeast pre-mRNA splicing<br>factor C8                       | 43           |
| <i>PRPH2</i>          | RP7, RDS            | adRP, adMD                     | Chr6:42.77                                                       | ChrB2:43.93                                                    | peripherin 2                                                          | 3            |
| <i>RHO</i>            | RP4                 | adRP, arRP,<br>adCSNB          | Chr3:13.07                                                       | ChrA2:61.17                                                    | rhodopsin                                                             | 5            |
| <i>ROM1</i>           |                     | adRP                           | Chr11:62.14                                                      | ChrD1:134.78                                                   | retinal outer segment membrane protein<br>1                           | 3            |
| <i>RP1</i>            |                     | adRP, arRP                     | Chr8:55.69                                                       | ChrF2:2.39                                                     | retinitis pigmentosa 1 protein                                        | 4            |
| <i>TOPORS</i>         | RP31                | adRP                           | Chr9:32.53                                                       | ChrD4:46.22                                                    | topoisomerase I-binding<br>arginine/serine-rich protein               | 3            |
| <i>RP33</i>           |                     | adRP                           | Chr2:cen-q12.1 <sup>§</sup>                                      | ChrA3:81.954 <sup>§</sup>                                      | unknown gene <sup>§</sup>                                             | ---          |
| <i>RP9</i>            |                     | adRP                           | Chr7:33.10                                                       | ChrA2:181.69                                                   | RP9 protein or PIM1-kinase associated<br>protein 1                    | 6            |
| <i>NR2E3</i>          | RP37                | arESC, arRP,<br>adRP, adR, arR | Chr15:69.89                                                      | ChrB3:42.13                                                    | nuclear receptor subfamily 2 group E3                                 | 8            |
| <i>RDH12</i>          |                     | arLCA, adRP                    | Chr14:67.24                                                      | ChrB3:116.96                                                   | retinol dehydrogenase 12                                              | 7            |
| <i>SEMA4A</i>         | RP35                | adRP                           | Chr1:15.44                                                       | ChrF1:87.61                                                    | semaphorin 4A                                                         | 15           |

\*<http://www.sph.uth.tmc.edu/Retnet/disease.htm#14.207d>; <sup>†</sup>UCSC Genome Browser was used to identify human gene locations;

<sup>‡</sup>GARField: Genome Annotation Resource Field *Felis catus* v12.2 was used to identify feline gene locations (17); <sup>§</sup>Linkage region not gene.

NT not tested; ad: autosomal dominant; ar: autosomal recessive; MD: macular dystrophy; RP: retinitis pigmentosa; CoRD: cone rod dystrophy; ESC: enhanced S-cone syndrome; R: retinopathy; CSNB: congenital stationary night blindness.
