# Supplementary material
Source: PubMed Central journal article supplement (PMC2891453)
Supplement: supp_51_6_2852__2.pdf [file supp_51_6_2852__2.pdf]

**Supplementary Table S2: Primers Used for Linkage Analysis, RT-PCR and cDNA Amplification and Genomic Amplification**

| Locus                                          | Cat Chromosome Position* | Repeat Motif | Cat Chromosome Position of Candidate Gene | Forward Primer          | Reverse Primer            | Expected PCR Product Size (bp) <sup>†</sup> |
|------------------------------------------------|--------------------------|--------------|-------------------------------------------|-------------------------|---------------------------|---------------------------------------------|
| <b>A. Candidate Genes for Linkage Analysis</b> |                          |              |                                           |                         |                           |                                             |
| CRX-STR-1                                      | chrE2_4411323            | GT(17)       | chrE2:9878631-9888696                     | AAATGGGAAATGATCACACCA   | GGATTTGAACCTTGGTAGCC      | 180                                         |
| CRX-STR-2                                      | chrE2_8469995            | GAAAA(11)    | chrE2:9878631-9888696                     | AAGCCCACTTGGGATTCTCT    | AACCCACAAACTGCAAGACC      | 212                                         |
| CRX-STR-3                                      | chrE2_9124338            | TC(17)       | chrE2:9878631-9888696                     | TTTGATTCCCCTTCCTTCCT    | CCAGACCGAAAGAGCAAAAG      | 240                                         |
| CRX-STR-4                                      | chrE2_9844244            | TGT (9)      | chrE2:9878631-9888696                     | TCTCAGCCTACAGCCCTCAT    | TACTCCAGGCCATGTTGGTT      | 195                                         |
| CRX-STR-5                                      | chrE2_9869856            | TC(12)       | chrE2:9878631-9888696                     | CCCTTTCTCCCTGTCCCTTC    | TCAAACCTCACACGGATGGAA     | 193                                         |
| CRX-STR-6                                      | chrE2_9930046            | GATA(12)     | chrE2:9878631-9888696                     | CATCAGTGGGTGGATACGTG    | AGGCTGAGACCTCACCTCAA      | 187                                         |
| CRX-STR-7                                      | chrE2_10072470           | AC(18)       | chrE2:9878631-9888696                     | CAACTCTGAGCTGGGTCTCC    | TGGAGCCTGCTTCATACACA      | 213                                         |
| CA4-STR-1                                      | chrE1_51619418           | GT(14)       | chrE1:51615939-51626834                   | ATTGTGTGGTGAGGGTGTCC    | CTGCAAGATTCCTTCATTC       | 153                                         |
| CA4-STR-2                                      | chrE1_51622966           | AC(13)       | chrE1:51615939-51626834                   | CTTTCTGTGTGGTGGGGACT    | CAGGGACGATTACAGGTCCT      | 196                                         |
| FSCN2-STR-1                                    | chrE1_132791160          | TG(16)       | chrE1:132815471-132821820                 | AACACGTGGTTCGCATATAGAAA | GTCCGTTTCTGCTTCAGTC       | 238                                         |
| FSCN2-STR-2                                    | chrE1_132790694          | TG(16)       | chrE1:132815471-132821820                 | TAGGGGTGGAAACATCGGTA    | GGATGTCTTGTGTTGTTAGGC     | 166                                         |
| GUCA1B-STR-1                                   | chrB2_43336600           | CA(12)       | chrB2:43329491-43359312                   | GCTGTAGCAGTTCACCATGC    | CCATCTGACTCCACACCTGA      | 151                                         |
| GUCA1B-STR-2                                   | chrB2_43349835           | GA(23)       | chrB2:43329491-43359312                   | AGGTCAGGGGTCAGTCTGTG    | TCACAGCTCGTGAGTTCGAG      | 250                                         |
| IMPDH1-STR-1                                   | chrA2_211262168          | GT(23)       | chrA2:211178423-211195849                 | CCTGGTGACAGATTCCCTTC    | GGGGGAAGTCACTCACTTAGA     | 176                                         |
| IMPDH1-STR-2                                   | chrA2_211280113          | TG(18)       | chrA2:211178423-211195849                 | TCTGCCCTTTGGCTCTTCTA    | TGGGGCCTAATCCAATATGA      | 234                                         |
| NRL-STR-1                                      | chrB3_81136567           | AC(13)       | chrB3:81226799-81263900                   | CCAAGACAGGCAAGGGTAAA    | AGCCCTTTTATCGGGTGAGT      | 209                                         |
| NRL-STR-2                                      | chrB3_81320847           | AC(24)       | chrB3:81226799-81263900                   | TGCCTCTCCTGAGATACTCCA   | AGTTCAAAAAGCAGGGGAAA      | 246                                         |
| PRPF3-STR-1                                    | chrC1_110561470          | AC(21)       | chrC1:110537087-110565694                 | GGCGCCTCTTGAAAGAAGTT    | AGGTCTGCAAAGGGGAGAAT      | 205                                         |
| PRPF3-STR-2                                    | chrC1_110445958          | AC(18)       | chrC1:110537087-110565694                 | CCCTTTGCCAATTTTCAGAGA   | ACGAGAGGTGGAACATGAGG      | 210                                         |
| PRPF8-STR-1                                    | chrE1_40285203           | AC(15)       | chrE1:40456491-40487323                   | TGTGCTAAGTGGGCTCACAG    | TCACATCTGGTTGGTGTAGGA     | 163                                         |
| PRPF8-STR-2                                    | chrE1_40586866           | GT(13)       | chrE1:40456491-40487323                   | GTTTCTTGGAGGCTGTTCCA    | GTAACAAAAGCGCCAAGTCC      | 150                                         |
| PRPF31-STR-1                                   | chrE2_3789762            | CA(21)       | chrE2:3841459-3861551                     | CCTTTTGCAAGTGGGATCAA    | GATTACTTTGCTGCTGCTGCT     | 245                                         |
| PRPF31-STR-2                                   | chrE2_3748602            | GT(20)       | chrE2:3841459-3861551                     | CCTGTTCACCAAACCCAGTC    | AGAGCTCTGGAAGGGGAGAG      | 188                                         |
| RDS-STR-1                                      | chrB2_43933483           | CA(12)       | chrB2:43925525-43956328                   | TGCATCCCTGTGTTTCATTGT   | AGATCCACCCACATTTTTGC      | 210                                         |
| RDS-STR-2                                      | chrB2_43919963           | AG(25)       | chrB2:43925525-43956328                   | GCTCTCGGTAGAGCATGGAA    | AAGCAGCCAGAGGAGAAGTG      | 237                                         |
| RHO-STR-1                                      | chrA2_61216010           | GT(18)       | chrA2:61166303-61173482                   | GGGTAAAGGGTTAGGGAACG    | TTTCTAAGTGTGTTGACCCACTACC | 156                                         |
| RHO-STR-2                                      | chrA2_61247220           | AC(21)       | chrA2:61166303-61173482                   | ATCAGTCCCCCTTGTCTTGA    | CACCCTGGAGAAGCTCATGT      | 223                                         |
| ROM1-STR-1                                     | chrD1_134733919          | TG(20)       | chrD1:134776545-134778178                 | CCGCATAGTTCTTGTCTGACA   | GGAAGCTCAATTCCTCACTG      | 209                                         |
| ROM1-STR-2                                     | chrD1_134766392          | GA(13)       | chrD1:134776545-134778178                 | AGCACGCAGTAGTGAAGAAGG   | GGTTGTGGGATGGAGACTTG      | 243                                         |
| RP1-STR-1                                      | chrF2_2382646            | TG(16)       | chrF2:2385740-2447214                     | ACCCCTTTGGGTTTCTTCAT    | CCAGTTGCAGAAACTGTCA       | 204                                         |
| RP1-STR-2                                      | chrF2_2458258            | GT(14)       | chrF2:2385740-2447214                     | CAAGGTGAGCCCATGATTCT    | ACGGTAGTGCATGCCAGAAG      | 210                                         |
| RP9-STR-1                                      | chrA2_181685918          | AC(20)       | chrA2:181685950-181886624                 | CTGGGCTTTGTACTGGGTGT    | TTCTGGAAATCCCTCCTTCC      | 235                                         |
| RP9-STR-2                                      | chrA2_181649004          | AC(17)       | chrA2:181685950-181886624                 | ACCTGAGCTGAAGTCGGATG    | TTTGTGCTGACAGCTTGGAG      | 228                                         |
| RP31-STR-1                                     | chrD4_46253243           | AC(20)       | chrD4:46221928-46233690                   | GGGGTATATGCACCCTGATG    | CACATGGTTGCAAATGGAAA      | 202                                         |
| RP31-STR-2                                     | chrD4_46126200           | TG(21)       | chrD4:46221928-46233690                   | TGGCATGTGGGCTTATATTTT   | CCATATTATGTGCTGGCAAGT     | 187                                         |
| RP33-STR-1                                     | chrA3_82132784           | GT(15)       | chrA3:81.95                               | GGGAAGTTTGTGCAAAGGTG    | AAAGCTTGTGAGCTGAGATGA     | 206                                         |
| RP33-STR-2                                     | chrA3_82037512           | GT(22)       | chrA3:81.95                               | GTCACCTGGAAGTGTGAGCA    | GATGGGGAAGAAGCTCACTG      | 222                                         |
| SEMA4A-STR-1                                   | chrF1_87839498           | AG(22)       | chrF1:87605971-87632039                   | GAGGCTAGATCTGGGGCTCT    | TCAGGCTCTGTGCTGACAGT      | 207                                         |
| SEMA4A-STR-2                                   | chrF1_87556640           | GT(12)       | chrF1:87605971-87632039                   | ACCTGACTCCTGGGATTGG     | TGGGGATGGAATTAGTTGGA      | 159                                         |
| NR2E3                                          | NT <sup>‡</sup>          |              | chrB3:42128408-42147338                   |                         |                           |                                             |
| RDH12                                          | NT                       |              | chrB3:116962316-116979737                 |                         |                           |                                             |

| Primer Set Name                         | CRX Amplification Region | Cat Chromosome Position of Amplified Product <sup>§</sup> | Forward Primer        | Reverse Primer        | Expected PCR Product Size (bp) |
|-----------------------------------------|--------------------------|-----------------------------------------------------------|-----------------------|-----------------------|--------------------------------|
| <b>B. RT PCR and cDNA Amplification</b> |                          |                                                           |                       |                       |                                |
| CRX-PCR-1                               | Exon 1 to 4              | 9878864-9890005                                           | GGCTTTGCCATCTGACAACCT | CGGGACTCCAGATGGACA    | 600                            |
| CRX-PCR-2                               | Exon 1 to 3              | 9878770-9888437                                           | CCAGGATTACCCTCCGAGAT  | GGGCAGGTTGATCTTCAGAG  | 436                            |
| CRX-PCR-3                               | Exon 2 to 4              | 9887379-9890165                                           | TGCACCAAGCTGTGTCCTAC  | TCCAGGCCACTGAAATAGGA  | 583                            |
| CRX-PCR-4                               | Exon 3 to 4              | 9888410-9890096                                           | GGAGGTGGCTCTGAAGATCA  | GTGTAGGTCATGGCGTAGGG  | 378                            |
| CRX-PCR-5                               | Exon 1 to 4              | 9878770-9889778                                           | CCAGGATTACCCTCCGAGAT  | CGGTTCTTGAACCAAACCTG  | 468                            |
| CRX-PCR-6                               | Exon 3 to 4              | 9888410-9890451                                           | GGAGGTGGCTCTGAAGATCA  | GGTTCAGACGGTTCAGACGA  | 739                            |
| <b>C. CRX Genomic Amplification</b>     |                          |                                                           |                       |                       |                                |
| CRX-PCR-7                               | Exon 1                   | 9878770-9878960                                           | CCAGGATTACCCTCCGAGAT  | CTCTTCCCTCTGCCACTCCT  | 191                            |
| CRX-PCR-8                               | Exon 1                   | 9878654-9879052                                           | ATCAGCCCTAATTGCCAAGA  | CTGTACCGGGTGCTGAGAA   | 399                            |
| CRX-PCR-9                               | Exon 2                   | 9887144-9887518                                           | ACGAACCACGAGATCCTGAC  | CATTTGGTCTGTGGCTCTGA  | 375                            |
| CRX-PCR-10                              | Exon 2                   | 9887176-9887425                                           | CTGACGCTTCACCAACTGAG  | GCCAGGAGAAGGACCGTA    | 250                            |
| CRX-PCR-11                              | Exon 3                   | 9888377-9888625                                           | CAAGACTCAGTACCCGGATG  | CTGGGGGAAGAAGCAGCA    | 249                            |
| CRX-PCR-12                              | Exon 3                   | 9888138-9888437                                           | GACGGAGTGAGGGCTACAAG  | GGGCAGGTTGATCTTCAGAG  | 300                            |
| CRX-PCR-13                              | Exon 4                   | 9889916-9890165                                           | TGGGCATCTCAGACTCCTACA | TCCAGGCCACTGAAATAGGA  | 250                            |
| CRX-PCR-14                              | Exon 4                   | 9889914-9890296                                           | CCTGGGCATCTCAGACTCCT  | GGCTGTAGGGACCGTAGCTC  | 383                            |
| CRX-PCR-15                              | Exon 4                   | 9889983-9890422                                           | CACGGTGTCCATCTGGAGT   | ACAGAGCTGGCTTCTACA    | 444                            |
| CRX-PCR-16                              | Exon 4                   | 9889762-9890005                                           | GTTTGGTTCAAGAACCGCAG  | CGGGACTCCAGATGGACA    | 244                            |
| CRX-PCR-17                              | Exon 4                   | 9890355-9890631                                           | CACGGACCCCTTGGACTAC   | GGGCTGGGTTGAGGGTTAC   | 277                            |
| CRX-PCR-18                              | Exon 4                   | 9890264-9890661                                           | CCCTGTCAGGCCAGAGCTA   | CAAAAGGCAGCTAAGAATCCA | 398                            |

<sup>†</sup>Position based on 2x cat sequence assembly from GARField of STR used in linkage analysis. <sup>†</sup>Expected PCR product size is the size expected based on amplification of the locus described in column 2 characterized from the 2X whole genome cat sequence assembly. The expected product size does not include adaptors to primers. <sup>‡</sup>NT not tested.

<sup>§</sup>Location of all Exon 4 primers are estimated based on new sequence generated in this study and subsequently aligned with GARField 2X assembly.
