# Supplementary material
Source: PubMed Central journal article supplement (PMC2891453)
Supplement: supp_51_6_2852__3.pdf [file supp_51_6_2852__3.pdf]

**Supplementary Table S3: LOD Scores for Additional Candidate Genes/Genomic Locations**

| Candidate<br>gene/genomic loc. | Marker       | Recombination Fraction/LOD<br>Score |          |         |         |         |         |         |
|--------------------------------|--------------|-------------------------------------|----------|---------|---------|---------|---------|---------|
|                                |              | 0.00                                | 0.01     | 0.05    | 0.10    | 0.20    | 0.30    | 0.40    |
| <i>CA4</i>                     | CA4-STR-1    | -16.1396                            | -7.2466  | -3.9453 | -2.4298 | -1.0481 | -0.4042 | -0.0938 |
| <i>CA4</i>                     | CA4-STR-2    | -14.8167                            | -6.8893  | -3.4888 | -2.0404 | -0.8074 | -0.2853 | -0.0597 |
| <i>FSCN2</i>                   | FSCN2-STR-1  | -10.2303                            | -5.9665  | -3.1720 | -1.9168 | -0.7914 | -0.2876 | -0.0617 |
| <i>FSCN2</i>                   | FSCN2-STR-2  | -10.2030                            | -7.0746  | -3.8230 | -2.3281 | -0.9728 | -0.3580 | -0.0779 |
| <i>GUCA1B</i>                  | GUCA1B-STR-1 | -infinity                           | -3.7201  | -1.7379 | -0.9814 | -0.3766 | -0.1393 | -0.0343 |
| <i>IMPDH1</i>                  | IMPDH1-STR-1 | -infinity                           | -9.4379  | -4.9140 | -3.0908 | -1.4227 | -0.5750 | -0.1367 |
| <i>NRL</i>                     | NRL-STR-1    | -infinity                           | -3.4476  | -1.5932 | -0.8507 | -0.2586 | -0.0553 | -0.0036 |
| <i>PRPF3</i>                   | PRPF3-STR-2  | -infinity                           | -2.7440  | -0.2259 | 0.6168  | 1.0448  | 0.8895  | 0.4306  |
| <i>PRPF8</i>                   | PRPF8-STR-2  | -infinity                           | -2.7662  | -0.2463 | 0.5986  | 1.0314  | 0.8806  | 0.4260  |
| <i>PRPF31</i>                  | PRPF31-STR-2 | -infinity                           | -1.4520  | -0.3146 | 0.1030  | 0.3375  | 0.2879  | 0.1168  |
| <i>RHO</i>                     | RHO-STR-1    | -infinity                           | -10.5476 | -5.2580 | -3.0978 | -1.2178 | -0.4109 | -0.0793 |
| <i>ROM1</i>                    | ROM1-STR-1   | -infinity                           | -4.0436  | -2.0375 | -1.2449 | -0.5518 | -0.2238 | -0.0549 |
| <i>RP1</i>                     | RP1-STR-1    | -infinity                           | -12.2779 | -6.2395 | -3.8008 | -1.6446 | -0.6434 | -0.1521 |
| <i>RP9</i>                     | RP9-STR-1    | -infinity                           | -6.5735  | -2.7382 | -1.3473 | -0.2940 | -0.0082 | 0.0189  |
| <i>TOPORS</i>                  | RP31-STR-1   | -infinity                           | -10.4520 | -5.0824 | -2.9619 | -1.1633 | -0.4059 | -0.0850 |
| <i>RP33</i>                    | RP33-STR-1   | -infinity                           | -1.4520  | -0.3146 | 0.1030  | 0.3372  | 0.2860  | 0.1135  |
| <i>SEMA4A</i>                  | SEMA4A-STR-2 | -infinity                           | -12.3739 | -6.3657 | -3.8983 | -1.6862 | -0.6517 | -0.1508 |

STRs for which primers were designed (Supplementary Table S2) and are not reported were not informative in the pedigree (i.e. they were homozygous in the two affected founders)
