# Supplementary material
Source: PubMed Central journal article supplement (PMC2891453)
Supplement: supp_51_6_2852__4.pdf [file supp_51_6_2852__4.pdf]

**Supplementary Table 4.** Homology of Feline CRX gene/Peptide to Other Mammalian Species

|           | <b>CRX amino acid seq.</b> | <b>CRX coding seq. (nuc.)*</b> | <b>Homeodomain (nuc.)</b> | <b>WSP (nuc.) Domain</b> | <b>Trans. 1 domain†</b> | <b>Trans. 2 domain</b> | <b>OTX tail</b> |
|-----------|----------------------------|--------------------------------|---------------------------|--------------------------|-------------------------|------------------------|-----------------|
| Cat:human | 94                         | 89                             | 100                       | 100                      | 100                     | 90                     | 100             |
| Cat:dog   | 96                         | 91                             | 100                       | 100                      | 100                     | 96.8                   | 100             |
| Cat:cow   | 94                         | 90                             | 100                       | 100                      | 96.9                    | 100                    | 100             |
| Cat:rat   | 92                         | 86                             | 100                       | 100                      | 96.9                    | 96.8                   | 100             |
| Cat:mouse | 93                         | 85                             | 100                       | 89                       | 96.9                    | 96.8                   | 100             |

nuc.;nucleotide  
Trans;transactivational
