# Supplementary material
Source: PubMed Central journal article supplement (PMC2891453)
Supplement: supp_51_6_2852__5.pdf [file supp_51_6_2852__5.pdf]

**SupplementaryTable S5.** Population Genetic Survey of Cat Breeds for *CRX Rdy* Mutation

| Breed                         | Sample size | <i>CRX</i><br>(n.546delC) | Wildtype | Frequency of<br><i>Rdy</i> allele |
|-------------------------------|-------------|---------------------------|----------|-----------------------------------|
| Abyssinian/Somali<br>(Sweden) | 69          | 0                         | 69       | 0                                 |
| Abyssinian/Somali<br>(USA)    | 16          | 0                         | 16       | 0                                 |
| American Curl                 | 1           | 0                         | 1        | 0                                 |
| American Wirehair             | 5           | 0                         | 5        | 0                                 |
| Bengal                        | 16          | 0                         | 16       | 0                                 |
| Bobtail                       | 12          | 0                         | 12       | 0                                 |
| Cornish Rex                   | 20          | 0                         | 20       | 0                                 |
| Devon Rex                     | 17          | 0                         | 17       | 0                                 |
| Exotic                        | 7           | 0                         | 7        | 0                                 |
| Egyptian Mau                  | 8           | 0                         | 8        | 0                                 |
| Himalayan                     | 15          | 0                         | 15       | 0                                 |
| Maine Coon Cat                | 13          | 0                         | 13       | 0                                 |
| Manx                          | 15          | 0                         | 15       | 0                                 |
| Ocicat                        | 6           | 0                         | 6        | 0                                 |
| Persian                       | 20          | 0                         | 20       | 0                                 |
| Scottish Fold                 | 16          | 0                         | 16       | 0                                 |
| Selkirk Rex                   | 15          | 0                         | 15       | 0                                 |
| Sphynx                        | 9           | 0                         | 9        | 0                                 |
| Total                         | 280         |                           |          |                                   |
