# Supplementary material
Source: PubMed Central journal article supplement (PMC2891453)
Supplement: supp_51_6_2852__6.pdf [file supp_51_6_2852__6.pdf]

**Supplementary Table S6:** Subset of Reported Human *CRX* Mutations Demonstrating the Heterogeneous Nature of the Disease Genotype and Phenotype.

| <b>Phenotype</b> | <b>Nucleotide Mutation</b> | <b>Mode of Inheritance</b> | <b>Amino Acid Mutation</b> | <b>Missense Location</b> | <b>Effect of PTC</b>  | <b>References</b> |
|------------------|----------------------------|----------------------------|----------------------------|--------------------------|-----------------------|-------------------|
| LCA              | 24-25 ins G                | recessive                  | P9A FS +60 and PTC         |                          | Suspected Null Allele | 77, 78            |
| CORD             | C121T                      | dominant                   | R41W                       | homeodomain              |                       | 58                |
| RP               | G122A                      | dominant                   | R41Q                       | homeodomain              |                       | 51, 57, 79        |
| CORD*            | G122A                      | dominant                   | R41Q                       | homeodomain              |                       | 58                |
| CORD             | G238A                      | dominant                   | E80K                       | homeodomain              |                       | 80                |
| CORD             | A239C                      | dominant                   | E80A                       | homeodomain              |                       | 51, 53            |
| LCA              | G268A                      | recessive                  | R90W                       | homeodomain              |                       | 55                |
| RP               | G324A                      | dominant                   | R115Q                      | Basic domain             |                       | 81                |
| LCA              | T438-T449 del 12           | dominant                   | P147-S150 deletion         |                          |                       | 51,81, 82         |
| CORD             | G502 del 1                 | dominant                   | E168S FS +17 and PTC       | WSP                      | eliminates TTD 1 & 2  | 53, 83            |
| LCA              | G502-503 del 2             | dominant                   | E168V FS +3 and PTC        | WSP                      | eliminates TTD 1 & 2  | 83, 84            |
| LCA              | T510 del 1                 | dominant                   | P170P FS +15 and PTC       | WSP                      | eliminates TTD 1 & 2  | 85                |
| LCA              | T571del1                   | dominant                   | Y191M FS +1 and PTC        |                          | eliminates TTD 1 & 2  | 57                |
| CORD             | C585 ins C                 | dominant                   | A196R FS +38 and PTC       |                          | eliminates TTD 1 & 2  | 51, 79            |
| CORD             | C587-C590 del 4            | dominant                   | A196G FS +20 and PTC       |                          | eliminates TTD 1 & 2  | 58                |
| CORD             | G724A                      | dominant                   | V242M                      | TTD 1                    |                       | 58                |

PTC premature termination codon; FS frame shift; TTD translational transactivation domain. TTD locations based on Chen et al, (41).

\* Later studies by Rivolta, et al., (57) suggested that the phenotype should be identified as RP.
